# Supplementary material for: Potential role of intestinal microflora in disease progression among patients with different stages of Hepatitis B
Source: Gut Pathog. 2020 Oct 27;12:50. doi: 10.1186/s13099-020-00391-4 (PMC7590496; doi:10.1186/s13099-020-00391-4)
Supplement: Supplementary file 7 — Additional file 7: Table S5. Top 30 abundant bacteria identified at the genus level for each group. [file 13099_2020_391_MOESM7_ESM.xlsx]

## Sheet: Sheet1
Genus	Control	GroupA	GroupB	GroupC	GroupD	GroupD/Control	Control/GroupD
Bacteroides	21.2336	17.2437	21.7044	19.5846	14.9131	0.702334	1.42382
Faecalibacterium	12.6882	8.95821	11.046	8.1223	5.18032	0.408278	2.44931
Streptococcus	0.90106	0.56476	5.60283	6.98919	6.40488	7.10816	0.140683
Prevotella_9	4.9471	6.23973	5.22098	3.00821	1.84982	0.37392	2.67437
Klebsiella	0.21313	0.71676	1.29125	2.9311	9.07157	42.5636	0.0234943
Enterococcus	0.0357	0.05249	0.34514	2.11497	10.1695	284.86	0.0035105
Escherichia-Shigella	0.51442	1.99689	2.10195	3.96113	4.30043	8.35976	0.119621
Lactobacillus	0.03761	0.07744	1.36935	4.43456	5.42599	144.27	0.00693145
Bifidobacterium	2.11417	1.35621	1.98817	1.84796	4.63093	2.19042	0.456532
Roseburia	4.27204	4.0731	3.63455	1.71927	0.2647	0.061961	16.1392
Veillonella	0.12061	0.06852	1.87115	2.35906	5.43211	45.0386	0.0222032
Ruminococcus]_gnavus_group	1.0469	1.28839	2.22256	3.34563	1.78182	1.702	0.587545
Parabacteroides	1.29897	0.97005	3.47565	2.14174	1.52877	1.17691	0.849683
Megamonas	3.12811	1.83178	1.45758	0.49066	3.69971	1.18273	0.845501
Agathobacter	3.30905	4.65183	1.27359	1.7165	0.15771	0.0476602	20.9819
Lachnospiraceae_unclassified	2.36604	2.48882	1.85665	2.14641	0.50447	0.213213	4.69015
Subdoligranulum	1.64671	1.40807	1.20753	1.67032	2.12758	1.29202	0.773983
Fusobacterium	2.98983	2.44395	1.61487	1.08608	0.8891	0.297375	3.36276
Lachnospira	2.67569	3.08385	2.01311	1.1215	0.08152	0.0304669	32.8225
Blautia	1.97594	2.16938	1.0823	1.18889	0.91566	0.463405	2.15794
Clostridium	1.42525	2.57865	1.29753	0.88336	0.26493	0.185883	5.37972
Ruminococcus_2	1.25694	1.74087	1.90825	0.71234	0.09194	0.0731459	13.6713
Ruminococcus]_torques_group	1.16448	1.68339	1.10054	0.77639	0.85178	0.731468	1.36711
Sutterella	1.27574	1.02083	1.35845	0.59094	0.80816	0.633483	1.57857
Erysipelatoclostridium	0.0723	0.05197	0.21871	0.39751	2.93911	40.6516	0.0245993
Prevotella_2	0.73327	0.87987	1.13985	0.81836	0.60794	0.829081	1.20616
Eubacterium]_eligens_group	1.59965	1.91574	0.7715	0.64839	0.10501	0.0656456	15.2333
Lachnoclostridium	1.64801	0.74295	0.74868	0.69853	0.46402	0.281564	3.55159
Ruminococcus_1	1.48017	1.47937	1.23268	0.24932	0.14215	0.0960363	10.4127
Collinsella	1.19245	0.85977	0.40002	0.92166	0.42934	0.360049	2.7774
Others	20.6369	25.3627	17.4441	21.3231	13.966	0.676748	1.47765
